**Table S1.** Input parameters used for the calibration of the mathematical model of  $\dot{M}O_{2\max}$  using reported data for rainbow trout at  $10\pm 1^\circ\text{C}$

| Parameters                                         | Input                 | Units                                                    | Reference                                                                                                                             |
|----------------------------------------------------|-----------------------|----------------------------------------------------------|---------------------------------------------------------------------------------------------------------------------------------------|
| Gill surface area                                  | 2.4                   | $\text{cm}^2 \text{g}^{-1}$                              | (Hughes, 1972)                                                                                                                        |
| Gill thickness                                     | 4.92                  | $\mu\text{m}$                                            | (Greco et al., 1996)<br>average of control and softwater acclimated fish                                                              |
| beta epithelium                                    | $1.77 \times 10^{-3}$ | $\mu\text{mol cm}^{-3} \text{mmHg}^{-1}$                 | (Boutilier et al., 1984; Jensen, 2017)                                                                                                |
| Diffusion coefficient ( $D_{O_2}$ )                | $4.4 \times 10^{-6}$  | $\text{cm}^2 \text{s}^{-1}$                              | Based on (Dejours, 1981; Hills and Hughes, 1970; Piiper and Baumgarten-Schumann, 1968) and adjusted to fit (Kiceniuk and Jones, 1977) |
| Gill diffusive conductance ( $G_d$ )               | 2.3                   | $\mu\text{mol mmHg}^{-1} \text{min}^{-1} \text{kg}^{-1}$ | Calculated from above                                                                                                                 |
| Tissue diffusive conductance ( $G_{dt}$ )          | 6.4                   | $\mu\text{mol mmHg}^{-1} \text{min}^{-1} \text{kg}^{-1}$ | Based on (Wang and Malte, 2011) and adjusted to fit (Kiceniuk and Jones, 1977)                                                        |
| $O_2$ solubility coefficient ( $\alpha$ ) in water | 2.24                  | $\mu\text{mol L}^{-1} \text{mmHg}^{-1}$                  | (Boutilier et al., 1984)                                                                                                              |
| $\alpha$ in blood plasma                           | 1.99                  | $\mu\text{mol L}^{-1} \text{mmHg}^{-1}$                  | (Boutilier et al., 1984)                                                                                                              |
| Water $PO_2$                                       | 150                   | $\text{mmHg}$                                            | (Wang and Malte, 2011)                                                                                                                |
| Haemoglobin $P_{50}$                               | 22.2                  | $\text{mmHg}$                                            | (Vorger, 1985)                                                                                                                        |
| Hill coefficient                                   | 2.09                  |                                                          | (Vorger, 1985)                                                                                                                        |
| Bohr coefficient                                   | -0.82                 |                                                          | (Vorger, 1985)                                                                                                                        |
| Max. arterial-venous pH shift                      | -0.12                 |                                                          | (Kiceniuk and Jones, 1977)                                                                                                            |
| Haemoglobin concentration                          | 1.05                  | $\text{mM}$                                              | Based on (Nikinmaa et al., 1981) and adjusted to fit (Kiceniuk and Jones, 1977)                                                       |
| Max. cardiac output ( $\dot{Q}_{\max}$ )           | 53                    | $\text{mL kg}^{-1} \text{min}^{-1}$                      | (Kiceniuk and Jones, 1977)                                                                                                            |
| Ventilation rate ( $\dot{V}_w$ )                   | 1700                  | $\text{mL kg}^{-1} \text{min}^{-1}$                      | (Kiceniuk and Jones, 1977)                                                                                                            |

**Table S2.**

[Click here to download Table S2](#)

## References

- Boutilier, R. G., Heming, T. A. and Iwama, G. K.** (1984). Physicochemical parameters for use in fish respiratory physiology. In *Fish Physiology* (ed. Hoar W. S. and Randall, D. J.), pp. 403–426. New York: Academic Press.
- Dejours, P.** (1981). *Principles of comparative respiratory physiology*. Amsterdam: Elsevier/North-Holland Biomedical Press.
- Greco, A. M., Fenwick, J. C. and Perry, S. F.** (1996). The effects of soft-water acclimation on gill structure in the rainbow trout *Oncorhynchus mykiss*. *Cell Tissue Res.* **285**, 75–82.
- Hills, B. A. and Hughes, G. M.** (1970). A dimensional analysis of oxygen transfer in the fish gill. *Resp. Physiol.* **9**, 126–140.
- Hughes, G. M.** (1972). Morphometrics of fish gills. *Respir Physiol* **14**, 1–25.
- Jensen, P.** (2017). A finite element model of oxygen diffusion in the fish gill.
- Kiceniuk, J. W. and Jones, D. R.** (1977). The oxygen transport system in trout (*Salmo gairdneri*) during sustained exercise. *J. Exp. Biol.* **69**, 247–260.
- Nikinmaa, M., Soivio, A. and Railo, E.** (1981). Blood volume of *Salmo gairdneri*: Influence of ambient temperature. *Comp. Biochem. Physiol., A: Physiol.* **69**, 767–769.
- Piiper, J. and Baumgarten-Schumann, D.** (1968). Effectiveness of O<sub>2</sub> and CO<sub>2</sub> exchange in the gills of the dogfish (*Scyliorhinus stellaris*). *Resp. Physiol.* **5**, 338–349.
- Vorger, P.** (1985). The Bohr effect of the blood in rainbow trout (*Salmo gairdneri*). A comparative study with human blood, using precise oxygen equilibrium curves and the Adair model. *Comp. Biochem. Physiol.* **82A**, 915–924.
- Wang, T. and Malte, H.** (2011). O<sub>2</sub> uptake and transport: the optimal P50. In *Encyclopedia of Fish Physiology: From Genome to Environment* (ed. Farrell, A. P.), Stevens, E. D.), Chech, J. R.), and Richards, J. G.), pp. 893–898. Elsevier.
